# Supplementary material for: Postoperative assessment of monocular multifocal bi-aspheric ablation pattern for correcting myopia with presbyopia
Source: Research Square preprint supplement (doi:10.21203/rs.3.rs-5995145/v1), 2025-04-14
Supplement: Supplementary file 1 [file 78d4a31b3b1e04c890222893.xlsx]

## Sheet: VA
		pre-DE			pre-NE			post-DE				post-NE				pre-DE-MRSE				pre-NE-MRSE				post-DE-MRSE				post-NE-MRSE					pre-CDVA		post-CDVA		pre-UDVA			post-UDVA		SI		EI
donmint eye	age	S	C	SE	S	C	SE	S	C	SE	axis	S	C	SE	axis	S	C	SE	axis	S	C	SE	axis	S	C	SE	axis	S	C	SE	axis		DE	NE	DE	NE	DE	NE	Bin	DE	NE	DE	NE	DE	NE
OD	48	-5	-0.25	-5.125	-5	-0.5	-5.25	-0.75	-0.5	-1	52	-1.25	-0.25	-1.375	96	-5	0	-5	0	-4.75	-0.5	-5	105	-0.5	0	-0.5	0	-1.25	0	-1.25	0		1	1	1	1	1.3	1.3	1	1	0.5	1	1	1	0.5
OD	42	-4.75	-0.74	-5.12	-4.75	-1	-5.25	-0.5	-0.25	-0.625	20	-1	-0.25	-1.125	62	-4.75	-0.75	-5.125	70	-4.5	-1	-5	102	0	0	0	0	-1	0	-1	0		1.2	1.2	1.2	1.2	1.2	1.3	1	1	0.6	1	1	0.833333	0.5
OD	44	-3	-0.75	-3.375	-2.5	-0.75	-2.875	0	0	0	0	-1.25	-0.25	-1.375	59	-3	-0.75	-3.375	91	-2.75	-0.75	-3.125	77	0	0	0	0	-1.25	0	-1.25	0		1.2	1.2	1.2	1.2	1.2	0.7	0.6	1.2	0.5	1	1	1	0.416667
OD	51	-6.75	-0.75	-7.125	-4.5	-1.5	-5.25	-0.5	-0.5	-0.75	85	-1	-0.25	-1.125	138	-6.75	-0.5	-7	174	-4.5	-1.25	-5.125	162	-0.75	0	-0.75	0	-1.75	-0.5	-2	138		1.2	1.2	1.2	1	1.3	1	1	0.8	0.5	1	0.833333	0.666667	0.5
OS	47	-6	-1.25	-6.625	-6	-0.25	-6.125	-0.75	-0.25	-0.875	14	-1.75	0	-1.75	0	-5.75	-1.25	-6.375	18	-5.75	0	-5.75	0	-0.75	0	-0.75	0	-1.75	0	-1.75	0		0.8	0.8	0.8	0.8	1.6	1.6	1	0.8	0.3	1	1	1	0.375
OD	49	-5	-1	-5.5	-4.5	-1.25	-5.125	-0.5	-0.25	-0.625	76	-1.5	-0.25	-1.625	121	-4.75	-0.75	-5.125	21	-4.25	-1	-4.75	177	0	0	0	0	-1.5	0	-1.5	0		1.2	1.2	1.2	1.2	1.2	1.1	0.9	1	0.5	1	1	0.833333	0.416667
OS	53	-3	-0.25	-3.125	-3.5	-0.25	-3.625	-0.25	-0.75	-0.625	173	-1.25	-0.5	-1.5	31	-3.25	0	-3.25	0	-2.5	0	-2.5	0	0	0	0	0	-1.5	-0.5	-1.75	31		1	1	1	1	1.2	1.2	0.9	1	0.4	1	1	1	0.4
OD	46	-7.75	-0.75	-8.125	-7.75	-0.75	-8.125	0	-0.5	-0.25	78	-0.75	-0.25	-0.875	76	-7.5	-0.5	-7.75	174	-7.25	-0.5	-7.5	1	0	0	0	0	-1.5	0	-1.5	0		1	1	1	1.2	1.6	1.6	1	1	0.6	1	1.2	1	0.5
OD	46	-4.5	-1.25	-5.125	-4	-1.75	-4.875	0	-0.25	-0.125	64	-1.25	-0.25	-1.375	161	-4.5	-1	-5	176	-4	-1.5	-4.75	9	0	0	0	0	-1.5	0	-1.5	0		1	1	1	1	1.2	1.2	0.9	1	0.5	1	1	1	0.5
OD	45	-4.25	0	-4.25	-4.75	-0.5	-5	-0.25	0	-0.25	0	-0.75	0	-0.75	0	-4.25	0	-4.25	0	-4.75	-0.5	-5	165	0	0	0	0	-0.75	0	-0.75	0		1	1	1	1	0.9	1	0.8	1	0.6	1	1	1	0.6
OD	49	-4.5	-0.75	-4.875	-3.75	-1.25	-4.375	-0.5	-0.25	-0.625	163	-1.25	-0.25	-1.375	155	-4.25	-0.5	-4.5	152	-3.5	-1.25	-4.125	4	0	0	0	0	-1.25	0	-1.25	0		1	1	1	1	1.2	1.2	0.8	1	0.6	1	1	1	0.6
OD	46	-3.25	-1.25	-3.875	-2.5	-1	-3	-0.25	-0.5	-0.5	1	-1.25	0	-1.25	0	-2.25	-1.5	-3	99	-2.75	-1.25	-3.375	67	0	0	0	0	-1.5	0	-1.5	0		1.2	1.2	1.2	1.2	1.1	1.1	0.8	1.2	0.6	1	1	1	0.5
OD	47	-3.5	-1.25	-4.125	-3.75	-0.5	-4	-0.25	-0.25	-0.375	44	-0.75	-0.25	-0.875	129	-3.5	-1	-4	6	-3.75	-0.5	-4	175	0	0	0	0	-1	0	-1	0		1	1	1	1	1.1	1	0.8	1	0.5	1	1	1	0.5
OD	44	-4.5	-0.5	-4.75	-4	-1	-4.5	-0.5	-0.25	-0.625	22	-1.25	-0.25	-1.375	11	-4	-0.5	-4.25	18	-3.5	-0.75	-3.875	178	0	0	0	0	-1.5	0	-1.5	0		1.2	1.2	1.2	1.2	1.3	1.3	1	1.2	0.6	1	1	1	0.5
OD	44	-4	-0.25	-4.125	-4	-0.25	-4.125	-0.5	0	-0.5	0	-1.5	-0.25	-1.625	173	-3.5	0	-3.5	0	-3.25	-0.5	-3.5	43	-0.5	0	-0.5	0	-1.5	0	-1.5	0		1.2	1.2	1.2	1.2	1.1	1.1	1	1.2	0.6	1	1	1	0.5
OD	55	-5	-2	-6	-4.75	-2	-5.75	-0.5	-0.5	-0.75	70	-1.25	0	-1.25	0	-5.25	-1.75	-6.125	2	-5	-1.75	-5.875	5	0	-0.5	-0.25	70	-1.5	0	-1.5	0		1	1.2	1	1.2	1.3	1.3	1	1	0.5	1	1	1	0.416667
OS	45	-6.75	-2	-7.75	-7	-2.75	-8.375	-0.25	0	-0.25	0	-1	0	-1	0	-6.75	-1.75	-7.625	176	-7	-2.5	-8.25	1	0	0	0	0	-1	0	-1	0		1	1.2	1.2	1.2	1.3	1.2	1	1	0.5	1.2	1	1	0.416667
OS	45	-6.25	-0.75	-6.625	-7	-1.5	-7.75	-0.25	0	-0.25	0	-1.5	0	-1.5	0	-7	-1.25	-7.625	109	-6	-0.75	-6.375	75	0	0	0	0	-1.25	0	-1.25	0		1	1	1	1	1.3	1.3	1.1	1.2	0.6	1	1	1.2	0.6
OD	46	-3.5	-2	-4.5	-1.5	-2	-2.5	0	-0.5	-0.25	8	-1.25	-0.5	-1.5	170	-3.25	-2	-4.25	11	-1.5	-2	-2.5	160	0	-0.5	-0.25	8	-1.75	-0.5	-2	170		1	1	1.2	1.2	1.1	1.2	1	1.2	0.6	1.2	1.2	1.2	0.5
OD	44	-2.5	-0.75	-2.875	-2.5	-0.75	-2.875	-0.25	-0.25	-0.375	41	-0.75	-0.25	-0.875	133	-2.5	-0.75	-2.875	32	-3.5	-0.75	-3.875	167	0	0	0	0	-1.25	-0.5	-1.5	133		1.2	1.2	1.2	1.2	1.1	1.3	1.1	1	0.5	1	1	0.833333	0.416667
OD	53	-0.25	-0.25	-0.375	-0.5	0	-0.5	0.5	-0.5	0.25	89	-0.5	0	-0.5	0	-0.5	0	-0.5	0	-0.75	0	-0.75	0	0	0	0	0	-1	0	-1	0		1	1	1	1	0	0.1	0	1	0.8	1	1	1	0.8
OD	46	-4.25	-0.75	-4.625	-3.75	-1.25	-4.375	-0.5	0	-0.5	0	-1.25	-0.25	-1.375	128	-3.75	-0.75	-4.125	88	-3.25	-1.25	-3.875	86	-0.5	0	-0.5	0	-0.75	0	-0.75	0		1	1	1	1	1.1	1.1	1	1	0.5	1	1	1	0.5
pre	CCT		K1		K2		DE-pupil diameter			NE-pupil diameter			ADD
	DE	NE	DE	NE	DE	NE	0.4lx	4lx	40lx	0.4lx	4lx	40lx	DE	NE	surgery-ADD
	538	536	42.2	43	42.3	42.6	6.53	4.56	3.39	6.13	5.17	3.5	1.25	1.25	2
	533	530	43.4	43.8	43.1	43.4	5.6	4.82	3.98	5.93	4.57	4.05	1.25	1.25	2.1
	515	510	43.5	44	43.9	44.8	5.46	4.61	4.19	6.13	5.17	4.01	1.25	1.25	1.9
	545	544	43.9	45	44.1	45	5.34	4.43	3.53	6.07	4.59	3.57	1.5	1.5	2
	523	522	42.3	44.2	42.7	43.3	6.12	5.3	4.21	6.27	5.45	4.15	1.5	1.5	2
	565	566	45.2	46.3	45.2	46	5	4.15	3.13	5.02	3.75	3.18	1.75	1.75	2
	564	567	40.9	41.7	40.8	41.5	6.36	3.99	3.05	5.91	4.15	3.02	1.75	1.75	1.9
	578	572	42.1	43.1	42	43.2	6.1	4.81	3.41	6.13	4.82	3.82	1.25	1.25	2.2
	584	579	40.1	41.7	39.9	41.9	6.17	5.01	4.08	6.11	5.16	4.02	1.5	1.5	1.95
	533	533	46.7	47	46.5	47.2	4.63	3.86	3.31	5.02	3.43	2.96	1.5	1.5	1.9
	570	573	43.5	44.7	43.7	45	5.99	4.95	4.05	5.97	4.71	3.76	1.5	1.5	1.75
	562	567	44.3	45	44.1	45.2	7.01	5.88	4.2	6.96	5.39	4.1	1	1	1.75
	521	520	42.7	45	43	45.2	4.94	4.1	3.54	5.17	4.24	3.92	1.25	1.25	2
	518	514	43	45.2	43.1	44.8	5.75	3.77	3.32	5.54	4.17	3.32	1	1	2.15
	589	586	41.4	42.7	41.6	42.2	6.2	5.35	3.9	5.94	4.5	3.56	1.25	1.25	2
	575	565	44.3	45.2	44.5	45.4	5.71	4.29	3.55	5.86	4.38	3.27	1.75	1.75	1.85
	521	512	42.4	42.7	42.4	43	5.99	4.98	3.66	6.01	4.43	4.27	1.5	1.5	2
	561	569	43.6	45.6	43.6	45.6	5.26	3.71	2.67	5.12	3.65	2.49	1.5	1.5	1.8
	553	553	43.2	44	43.2	44.5	5.73	5	3.68	6.15	5.21	3.84	1	1	1.8
	524	519	44.7	46.5	45	46.4	6.06	4	3.27	5.55	3.4	3.08	2.25	2.25	2
	565	566	42.5	43	43	43.7	6.22	5.31	3.68	6.43	5.52	4.01	1.25	1.25	1.85
	519	513	46.1	46.4	45.9	46	5.622	4.07	3.21	5.7	4.06	3.04	1.25	1.25	2
UDVA	pre			post-1d			post-1week			post-1month			post-3months			post-6months
	DE	NE	Bin	DE	NE	Bin	DE	NE	Bin	DE	NE	Bin	DE	NE	Bin	DE	NE	Bin
	1.3	1.3	1	0	0.4	0	0	0.2	0	0	0.3	0	0.1	0.3	0.1	0	0.3	0
	1.2	1.3	1	0	0.2	0	0	0.1	0	-0.1	0.2	0	-0.1	0.2	-0.1	0	0.2	-0.1
	1.2	1.2	1.1	0	0.3	0	-0.1	0.2	0	-0.1	0.3	0	-0.1	0.3	-0.1	-0.1	0.3	-0.1
	1.3	1	1	0	0.3	0	0	0.5	0	0.1	0.2	0.1	0.1	0.2	0.1	0.1	0.3	0.1
	1.6	1.6	1.2	0.1	0.6	0.1	0.1	0.4	0.1	0.1	0.5	0.1	0.1	0.5	0.1	0.1	0.5	0.1
	1.2	1.1	0.9	0	0.2	0	0	0.2	0	0	0.3	0	0	0.3	0	0	0.3	0
	1.2	1.2	0.9	0.1	0.6	0	0.1	0.5	0	0.1	0.5	0	0.1	0.5	0	0	0.4	0
	1.6	1.6	1.2	0	0.4	0	-0.1	0.1	-0.1	0	0.2	0	0	0.2	0	0	0.2	0
	1.2	1.2	0.9	0.1	0.4	0.1	0	0.2	0	0	0.2	0	0	0.3	0	0	0.3	0
	0.9	1	0.8	0	0.3	0	0	0.3	0	0	0.2	0	0	0.2	0	0	0.2	0
	1.2	1.2	0.8	0.1	0.7	0.1	0	0.3	0	0	0.2	0	0	0.2	0	0	0.2	0
	1.1	1.1	0.8	0	0.2	0	-0.1	0.2	-0.1	0	0.2	-0.1	-0.1	0.2	-0.1	-0.1	0.2	-0.1
	1.1	1	0.8	0	0.4	0	-0.1	0.2	0	-0.1	0.3	-0.1	-0.1	0.3	0	0	0.3	-0.1
	1.3	1.3	1	0	0.4	-0.1	-0.1	0.3	-0.1	-0.2	0.2	-0.2	-0.1	0.2	-0.1	-0.1	0.2	-0.1
	1.1	1.1	1	0	0.2	0	-0.1	0.2	-0.1	0	0.2	0	0	0.3	-0.1	-0.1	0.2	-0.1
	1.3	1.3	1	0.1	0.4	0.1	-0.1	0.2	-0.1	0	0.2	-0.1	0	0.3	0	0	0.3	0
	1.2	1.3	1.1	0	0.3	0	-0.1	0.2	-0.1	-0.1	0.2	-0.1	-0.1	0.2	-0.1	0	0.3	0
	1.3	1.3	1.1	0	0.3	0	0	0.2	0	0	0.4	0	-0.1	0.1	-0.1	-0.1	0.2	-0.1
	1.2	1.1	1	-0.1	0.6	0	-0.1	0.3	-0.1	-0.1	0.2	-0.1	-0.1	0.2	-0.1	-0.1	0.2	-0.1
	1.2	1.3	1	-0.1	0.2	-0.1	-0.1	0.2	-0.1	-0.1	0.1	-0.1	0.1	0.4	-0.1	0	0.3	-0.1
	0	0.2	0	0	0.4	0	0	0.4	0	0	0.3	0	0	0.2	0	0	0.1	-0.1
	1.1	1.1	1	0	0.3	0	0	0.3	0	0	0.5	0	0	0.5	0	0	0.3	0
UIVA	pre			post-1d			post-1week			post-1month			post-3months			post-6months
	DE	NE	Bin	DE	NE	Bin	DE	NE	Bin	DE	NE	Bin	DE	NE	Bin	DE	NE	Bin
	0.5	0.5	0.5	0.2	0.1	0	0.2	0	-0.1	0	0	-0.1	0	0	-0.1	0	0	-0.1
	0.4	0.5	0.4	0.1	0.1	0	0	-0.1	-0.1	-0.1	-0.1	-0.1	0	0	-0.1	-0.1	-0.1	-0.1
	0.3	0.3	0.2	-0.1	0	-0.1	-0.1	0	-0.1	-0.1	0	-0.1	-0.1	0.1	-0.1	-0.1	0	-0.1
	0.8	0.6	0.7	0	0	0	0	0	-0.1	-0.1	0.1	-0.1	-0.1	0	-0.1	-0.1	0	-0.1
	0.6	0.6	0.6	0.1	0.1	0	0.1	0.1	0	0	0.1	0	0.1	0.1	0	0.1	0.1	0
	0.5	0.6	0.5	0	0	0	0	0	-0.1	0	0	0	0	0	-0.1	-0.1	-0.1	-0.1
	0.3	0.3	0.3	0.1	0.4	0	0.1	0.4	0	0	0.3	0	0	0.4	0	0	0.4	0
	0.7	0.7	0.6	-0.1	0.1	-0.1	0	-0.1	-0.1	0	-0.1	-0.1	0	-0.1	-0.1	0	0	-0.1
	0.5	0.5	0.4	0.1	0.1	0	0.1	0	0	0	0	0	-0.1	-0.1	-0.1	-0.1	-0.1	-0.1
	0.3	0.4	0.3	0	0	-0.1	0	0	-0.1	-0.1	-0.1	-0.1	-0.1	0	-0.1	-0.1	-0.1	-0.1
	0.5	0.5	0.4	0	0.1	0	0	0	0	0	0	0	0	0	0	0	0	0
	0.3	0.3	0.3	0	0	-0.1	0	0	-0.1	0	0	-0.1	-0.1	0	-0.1	-0.1	0	-0.1
	0.2	0.2	0.2	0	0	0	0	-0.1	-0.1	0	-0.1	-0.1	0	0	-0.1	0	0	-0.1
	0.3	0.3	0.3	0	0.2	-0.1	-0.1	-0.1	-0.1	-0.1	-0.1	-0.1	-0.1	-0.1	-0.1	-0.1	0	-0.1
	0.3	0.2	0.2	0	0.1	0	0	0.1	0	-0.1	0.1	-0.1	-0.1	0	-0.1	0	0	-0.1
	0.3	0.2	0.2	-0.1	0	-0.1	0.1	-0.1	-0.1	-0.1	-0.1	-0.1	-0.1	0	-0.1	-0.1	0	-0.1
	0.3	0.3	0.3	0.2	0.1	0.1	0.1	-0.1	-0.1	0	-0.1	-0.1	0	0	-0.1	0	0	-0.1
	0.4	0.4	0.3	0	0.3	0	0	0.2	0	0	0.2	0	-0.1	0	-0.1	-0.1	0	-0.1
	0.3	0.3	0.3	0.1	0.4	0.1	0.2	0.2	0.2	-0.1	0.1	-0.1	0	0.3	0	-0.1	0	-0.1
	0.4	0.4	0.3	0	0.1	-0.1	0	0.1	-0.1	-0.1	-0.1	-0.1	0	0	-0.1	0	0	-0.1
	0.2	0.3	0.2	0.1	0.1	0	0	0.1	0	0	0.2	0	0	0.1	0	0	0	0
	0	0.1	0	0	0	-0.1	0	0	-0.1	0	-0.1	-0.1	-0.1	-0.1	-0.1	0	-0.1	-0.1
UNVA	pre			post-1d			post-1week			post-1month			post-3months			post-6months
	DE	NE	Bin	DE	NE	Bin	DE	NE	Bin	DE	NE	Bin	DE	NE	Bin	DE	NE	Bin
	0.6	0.6	0.6	0.3	0	0	0.2	0	-0.1	0.2	-0.1	-0.1	0	0.1	-0.1	0	0	-0.1
	0.4	0.5	0.5	0.4	0.1	0.1	0.4	0.1	0.1	0.4	0	-0.1	0.3	0	-0.1	0.3	0	-0.1
	0.5	0.5	0.5	0.2	-0.1	0	0.3	0	0	0.3	0	-0.1	0.1	-0.1	-0.1	0.3	0	0
	0.7	0.5	0.5	0.3	0	0	0.3	0	0	0.3	0	0	0.2	0	0	0.1	0	-0.1
	0.6	0.6	0.6	0.2	0.1	0.1	0.1	0	0	0.1	0	0	0.1	0	0	0.2	0	0
	0.5	0.6	0.4	0.3	0	-0.1	0.2	0	0	0.2	0	0	0.3	0	-0.1	0.1	-0.1	-0.1
	0.5	0.3	0.3	0.3	0.1	0.1	0.3	0	0	0.3	0.1	0	0.1	0	0	0.2	0	0
	0.5	0.5	0.5	0.1	0	-0.1	0	-0.1	-0.1	0	-0.1	-0.1	0	-0.1	-0.1	0	-0.1	-0.1
	0.5	0.5	0.4	0.3	0.1	0.1	0.4	0	0	0.4	-0.1	-0.1	0.2	0	0	0.2	0	0
	0.5	0.5	0.5	0.1	0	0	0.3	0	0	0.3	0	0	0.3	-0.1	-0.1	0.3	0	-0.1
	0.4	0.4	0.4	0.1	0	0	0.3	0.1	0.1	0.3	0.1	0.1	0.3	0	0	0.3	0	0
	0.3	0.4	0.4	0	0	-0.1	0.2	0	-0.1	0.2	0	-0.1	0.1	0	-0.1	0.2	-0.1	-0.1
	0.4	0.4	0.4	0.2	0	0	0.3	0	-0.1	0.3	0	-0.1	0.3	-0.1	-0.1	0.3	0	-0.1
	0.5	0.5	0.4	-0.1	0	-0.1	0	-0.1	-0.1	0	-0.1	-0.1	0	-0.1	-0.1	0	-0.1	-0.1
	0.5	0.5	0.5	0	0.1	0	0.1	-0.1	-0.1	0.1	-0.1	-0.1	0	0	-0.1	0	-0.1	0
	0.3	0.3	0.2	0.1	0	0	0	-0.1	-0.1	0	-0.1	-0.1	0	-0.1	-0.1	0	-0.1	-0.1
	0.6	0.6	0.6	0.2	0	0	0.3	0.1	0.1	0.3	0	0	0.2	0	-0.1	0.2	0	-0.1
	0.5	0.5	0.4	0.2	0.1	0.1	0.3	-0.1	-0.1	0.3	-0.1	-0.1	0	-0.1	-0.1	0.1	-0.1	-0.1
	0.3	0.4	0.4	0.3	0.2	0.1	0.4	0	0	0.1	-0.1	-0.1	0.1	-0.1	-0.1	0.1	-0.1	-0.1
	0.4	0.4	0.4	0.1	-0.1	-0.1	0.1	-0.1	-0.1	0.1	-0.1	-0.1	0.1	0	-0.1	0.1	0	-0.1
	0.4	0.4	0.3	0.3	0	0	0.3	0	0	0.4	0	0	0.4	0	0	0.4	0	0
	0.3	0.3	0.3	0.3	0.1	0.1	0.4	0.1	0.1	0.3	0.1	0.1	0.3	0.1	0.1	0.4	0.2	0.2

## Sheet: CS
DE	pre	1.5c/d	3c/d	6c/d	12c/d	18c/d	post	1.5c/d	3c/d	6c/d	12c/d	18c/d				NE	pre	1.5c/d	3c/d	6c/d	12c/d	18c/d	post	1.5c/d	3c/d	6c/d	12c/d	18c/d
		1.5563	1.75587	1.95424	1.34242	1.07918		1.5563	1.75587	1.95424	1.34242	1.07918						1.39794	1.75587	1.95424	1.17609	1.07918		1.39794	1.82607	1.95424	1.17609	1.07918
		1.85126	2.0569	1.95424	1.47712	1.23045		1.85126	0.90309	1.95424	1.47712	0.69897						1.85126	1.90309	1.95424	1.63347	1.07918		1.85126	1.90309	1.95424	1.63347	1.07918
		1.69897	1.90309	1.95424	1.47712	1.23045		1.69897	1.90309	1.95424	1.47712	1.23045						1.69897	1.90309	1.95424	1.63347	1.23045		1.69897	1.90309	1.95424	1.63347	1.23045
		1.5563	1.90309	1.80618	1.34242	0.90309		1.69897	1.90309	1.95424	1.34242	1.07918						1.39794	1.75587	1.51851	1.04139	0.778151		1.69897	1.75587	1.95424	1.47712	1.07918
		1.25527	1.60206	1.65321	1.17609	0.60206		1.25527	1.4624	1.51851	1.17609	0.778151						1.85126	2.20412	2.10721	1.47712	1.07918		1.85126	2.0569	2.10721	1.47712	1.07918
		2	2.0569	1.80618	1.47712	1.07918		1.69897	1.90309	1.95424	1.47712	1.51851						1.5563	1.75587	2.10721	1.34242	1.07918		1.39794	1.60206	1.65321	1.34242	1.07918
		1.39794	1.60206	1.65321	1.34242	1.07918		1.5563	1.60206	1.80618	1.47712	0.90309						1.39794	1.4624	1.65321	1.34242	1.07918		1.5563	1.90309	1.80618	0.90309	1.07918
		1.5563	1.75587	1.80618	1.63347	1.36173		1.39794	1.4624	1.65321	1.17609	0.90309						1.39794	1.75587	1.80618	1.63347	1.07918		1.25527	1.60206	1.95424	1.63347	1.23045
		1.39794	1.90309	2.10721	1.63347	1.36173		1.39794	1.90309	2.10721	1.63347	1.36173						1.39794	1.60206	1.80618	1.47712	1.07918		1.39794	1.75587	1.80618	1.47712	1.07918
		1.85126	1.90309	2.10721	1.34242	1.81291		1.69897	1.90309	1.80618	1.17609	1.07918						2	1.75587	2.10721	1.63347	1.07918		1.85126	1.90309	2.10721	1.34242	1.07918
		1.5563	1.75587	1.95424	1.34242	0.90309		1.69897	2.0569	1.95424	1.47712	1.51851						1.39794	1.90309	2.25527	1.63347	1.23045		1.5563	1.75587	1.95424	1.34242	1.07918
		2	1.90309	2.10721	1.34242	0.778151		1.69897	1.75587	1.95424	1.34242	1.07918						1.69897	1.75587	1.95424	1.34242	0.778151		1.39794	1.75587	2.10721	1.34242	0.778151
		2	2.20412	2.25527	1.34242	0.90309		1.5563	1.75587	1.51851	1.17609	0.778151						1.5563	1.75587	1.95424	1.63347	1.07918		1.5563	1.75587	1.95424	1.47712	1.07918
		1.5563	1.4624	1.80618	1.04139	0.778151		1.69897	2.0569	2.10721	1.63347	1.07918						1.5563	1.60206	1.51851	1.04139	0.60206		2	2.0569	2.25527	1.77815	1.07918
		1.5563	1.90309	2.10721	1.63347	0.778151		1.5563	2.0569	1.80618	1.63347	1.07918						1.85126	1.75587	1.95424	1.47712	1.07918		1.69897	1.90309	1.95424	0.90309	0.90309
		1.69897	2.0569	2.25527	1.77815	1.66276		1.69897	1.90309	2.25527	1.47712	1.36173						1.5563	1.75587	1.80618	1.63347	1.23045		1.5563	1.75587	1.95424	1.47712	1.07918
		1.39794	1.4624	1.51851	1.17609	0.90309		1.69897	1.90309	2.10721	1.63347	1.07918						2	2.0569	2.10721	1.77815	1.51851		2	1.90309	2.10721	1.47712	1.51851
		1.69897	1.60206	1.80618	1.63347	1.25527		1.85126	1.90309	2.10721	1.77815	1.51851						1.39794	1.75587	1.80618	1.17609	0.60206		2	2.0569	2.25527	1.63347	1.07918
		1.5563	1.75587	1.95424	1.47712	1.23045		1.39794	1.60206	1.65321	1.34242	1.07918						1.5563	1.75587	1.95424	1.47712	1.51851		1.69897	1.90309	2.10721	1.63347	1.23045
		1.39794	1.4624	1.65321	1.17609	0.60206		1.39794	1.4624	1.51851	1.07918	0.60206						1.5563	1.60206	2.10721	1.63347	1.36173		1.5563	1.75587	2.10721	1.63347	0.90309
		1.69897	1.90309	1.95424	1.63347	1.07918		1.5563	1.90309	2.10721	1.63347	1.36173						1.39794	1.60206	1.65321	1.17609	0.778151		1.39794	1.4624	1.65321	1.17609	0.778151
		1.85126	1.75587	2.25527	1.63347	1.23045		1.85126	1.75587	2.10721	1.63347	1.23045						1.5563	1.75587	1.95424	1.63347	1.07918		1.5563	2.0569	2.10721	1.77815	1.51851

## Sheet: defocus curve
	post		2D	1.5D	1D	0.5D	0D	-0.5D	-1D	-1.5D	-2D	-2.5D	-3D	-3.5D	-4D					2D	1.5D	1D	0.5D	0D	-0.5D	-1D	-1.5D	-2D	-2.5D	-3D	-3.5D	-4D
																		pre
		Bin	0.4	0.3	0.1	0	-0.1	0	0	0.1	0.1	0.2	0.4	0.7	0.9				Bin	0.7	0.2	0.1	0	-0.1	-0.1	-0.1	0	0	0.1	0.2	0.2	0.5
		Bin	0.7	0.2	0.1	0	-0.2	-0.2	-0.2	0	0.1	0.1	0.3	0.4	0.5				Bin	0.4	0.1	0	-0.1	-0.2	-0.1	0	0.2	0.2	0.2	0.5	0.5	0.7
		Bin	0.4	0.1	-0.1	-0.1	-0.1	-0.1	-0.1	-0.1	-0.1	0.1	0.1	0.2	0.2				Bin	0.2	0	-0.1	-0.1	-0.1	-0.1	-0.1	-0.1	0	0	0.2	0.2	0.3
		Bin	0.2	0.1	0	0	-0.1	-0.1	-0.1	0.1	0.2	0.4	0.6	0.8	0.9				Bin	0.7	0.3	0.2	0	0	0	0.1	0.2	0.4	0.4	0.5	0.5	0.7
		Bin	0.2	0.1	0.1	0.1	-0.1	0	0	0.1	0.1	0.2	0.4	0.5	0.5				Bin	0.2	0.1	0.1	0.1	0	0	0	0.1	0.1	0.2	0.4	0.5	0.5
		Bin	0.2	0.2	0	-0.1	0	-0.1	-0.1	-0.1	0	0.2	0.1	0.2	0.3				Bin	0.8	0.5	0.2	0	-0.1	-0.1	-0.1	-0.1	0	0.3	0.4	0.5	0.7
		Bin	0.2	0.1	-0.1	-0.1	-0.1	-0.1	-0.1	0	0.2	0.4	0.7	0.8	0.8				Bin	0.7	0.3	0.2	0	0	0	0.1	0.2	0.4	0.4	0.5	0.6	0.7
		Bin	0.3	0.1	0	0	-0.1	-0.1	-0.1	0	0.1	0.3	0.3	0.3	0.4				Bin	0.2	0.1	0	-0.1	-0.1	-0.1	0	0	0.1	0.3	0.4	0.7	0.8
		Bin	0.6	0.3	0.1	0	0	0.1	0.1	0.1	0.1	0.2	0.4	0.5	0.6				Bin	0.4	0.2	0.1	0	-0.1	-0.1	0.1	0.2	0.3	0.4	0.8	0.8	1
		Bin	0.4	0.3	0.2	0.1	-0.1	-0.1	-0.1	0	0	0.1	0.2	0.4	0.6				Bin	0.4	0.3	0.2	0.1	0	-0.1	-0.1	-0.1	0	0.1	0.2	0.4	0.6
		Bin	0.4	0.2	0.2	0.1	-0.1	-0.1	-0.1	0	0.1	0.2	0.2	0.3	0.4				Bin	0.7	0.2	0.2	0.1	-0.1	-0.1	-0.1	0	0.1	0.2	0.2	0.3	0.4
		Bin	0.3	0.2	0	-0.1	-0.1	-0.1	-0.1	0	0.2	0.4	0.5	0.5	0.5				Bin	0.3	0.2	0	-0.1	-0.1	-0.1	-0.1	0	0.2	0.4	0.5	0.5	0.5
		Bin	0.5	0.3	0.2	0	-0.1	-0.2	-0.1	-0.1	0.1	0.2	0.2	0.3	0.5				Bin	0.5	0.3	0.2	-0.1	-0.2	-0.2	-0.1	-0.1	0.1	0.2	0.2	0.3	0.5
		Bin	0.2	0.1	0	-0.1	-0.2	-0.1	-0.1	-0.1	-0.1	0.1	0.1	0.2	0.2				Bin	0.2	0	-0.1	-0.1	-0.2	-0.1	-0.1	-0.1	0	0.1	0.2	0.2	0.3
		Bin	0.3	0.1	0	-0.1	-0.1	-0.1	-0.1	-0.1	-0.1	0	0	0.1	0.1				Bin	0.2	0.1	0	-0.1	-0.1	-0.1	-0.1	-0.1	0	0	0.2	0.2	0.3
		Bin	0.7	0.4	0.2	0	-0.1	-0.1	-0.1	0	0	0.1	0.3	0.3	0.4				Bin	0.7	0.4	0.2	0	-0.1	-0.1	-0.1	0	0	0.1	0.3	0.3	0.4
		Bin	0.3	0.2	0.1	0	-0.1	-0.1	-0.1	0	0.1	0.2	0.3	0.4	0.5				Bin	0.3	0.2	0.1	0	-0.1	-0.1	-0.1	0	0.1	0.2	0.3	0.4	0.5
		Bin	0.1	-0.1	-0.1	-0.1	-0.1	-0.1	-0.1	-0.1	-0.1	0	0.1	0.2	0.3				Bin	0	-0.1	-0.1	-0.1	-0.1	-0.1	0	0	0.1	0.2	0.2	0.3	0.3
		Bin	0.2	0	0	-0.1	-0.1	-0.1	-0.1	-0.1	0.1	0.2	0.5	0.6	0.7				Bin	0.3	0	-0.1	-0.1	-0.2	-0.1	0	0.1	0.2	0.2	0.4	0.6	0.6
		Bin	0.2	0	0	-0.1	-0.1	-0.1	-0.1	0	0	0.1	0.1	0.2	0.2				Bin	0.2	0	0	-0.1	-0.1	-0.1	0.1	0.2	0.3	0.4	0.5	0.6	0.6
		Bin	0.8	0.3	0.1	0	-0.1	-0.1	0.1	0.4	0.5	0.7	0.8	0.8	0.8				Bin	0.9	0.4	0.2	0.1	-0.1	0	0.1	0.3	0.5	0.6	0.8	1	1
		Bin	0.2	0.1	-0.1	-0.1	-0.1	-0.1	-0.1	-0.1	-0.1	0	0.1	0.3	0.3				Bin	0.2	0	-0.1	-0.1	-0.1	-0.1	-0.1	-0.1	0	0	0.2	0.2	0.3
	post
		DE	0.4	0.3	0.1	0.1	0	0.1	0.2	0.3	0.3	0.4	0.5	0.7	0.8			pre	DE	0.7	0.3	0.1	0.1	-0.1	-0.1	-0.1	0	0	0	0.2	0.2	0.5
		DE	0.5	0.2	0	-0.1	-0.1	-0.1	0.1	0.2	0.4	0.6	0.7	0.7	0.8				DE	0.5	0.2	0	-0.1	-0.1	-0.1	0.1	0.2	0.4	0.5	0.7	0.7	0.8
		DE	0.4	0.1	-0.1	-0.1	-0.1	-0.1	-0.1	0.1	0.1	0.3	0.4	0.5	0.5				DE	0.3	0.2	0.1	-0.1	-0.2	-0.1	-0.1	0.1	0.3	0.3	0.4	0.6	0.7
		DE	0.4	0.3	0.1	0	-0.1	-0.1	-0.1	0.2	0.3	0.5	0.7	0.9	0.9				DE	0.8	0.3	0.2	0	0	0	0.1	0.2	0.4	0.4	0.5	0.5	0.8
		DE	0.4	0.3	0.1	0.1	0	0.2	0.2	0.2	0.3	0.3	0.4	0.5	0.7				DE	0.3	0.2	0.1	0	0	0	0.1	0.2	0.2	0.3	0.4	0.5	0.7
		DE	0.3	0.1	-0.1	0	0	0	0	0.1	0.2	0.2	0.4	0.5	0.7				DE	0.3	0.1	0	0	-0.1	-0.1	0	0.1	0.2	0.2	0.4	0.5	0.7
		DE	0.3	0.2	0	0	0	0.1	0.1	0.3	0.7	0.6	0.8	0.8	0.8				DE	0.8	0.4	0.3	0.1	0	0	0.2	0.3	0.4	0.4	0.7	0.7	0.8
		DE	0.7	0.3	0.2	0	0	0	0.1	0.1	0.2	0.3	0.3	0.4	0.4				DE	0.3	0.2	0	-0.1	-0.1	0	0.1	0.1	0.2	0.3	0.5	0.8	1
		DE	0.7	0.3	0.1	0.1	0	0.1	0.1	0.2	0.1	0.3	0.7	0.9	1				DE	0.7	0.4	0.2	0.1	-0.1	0	0.1	0.2	0.3	0.4	0.8	0.8	1
		DE	0.5	0.4	0.3	0.2	0	0	0.1	0.1	0.1	0.2	0.4	0.5	0.7				DE	0.5	0.4	0.3	0.2	0	0	0.1	0.1	0.1	0.2	0.4	0.5	0.7
		DE	0.7	0.3	0.2	0.1	-0.1	-0.1	-0.1	0.1	0.2	0.3	0.4	0.8	0.8				DE	0.4	0.2	0.2	0.1	-0.1	-0.1	-0.1	0	0.1	0.2	0.2	0.3	0.4
		DE	0.4	0.2	0	-0.1	-0.1	-0.1	0	0.1	0.3	0.4	0.5	0.7	0.8				DE	0.7	0.7	0.3	0.1	-0.2	-0.2	-0.1	-0.1	0	0	0.2	0.2	0.3
		DE	0.8	0.6	0.2	0	-0.1	-0.1	-0.1	0	0.2	0.4	0.7	0.8	0.8				DE	0.8	0.6	0.2	0	-0.1	-0.1	-0.1	0	0.2	0.4	0.7	0.8	0.8
		DE	0.3	0.1	0	-0.1	-0.1	-0.1	-0.1	-0.1	-0.1	0.1	0.2	0.2	0.3				DE	0.3	0.1	0	-0.1	-0.1	-0.1	-0.1	-0.1	-0.1	0	0.2	0.3	0.4
		DE	0.4	0.2	0.1	-0.1	-0.1	0	0	0	0	0	0.1	0.2	0.2				DE	0.4	0.3	0.1	-0.1	-0.1	-0.1	-0.1	0.1	0.2	0.3	0.3	0.3	0.4
		DE	0.8	0.7	0.5	0.3	0	0	0	0	0	0.1	0.3	0.4	0.5				DE	0.8	0.7	0.5	0.3	-0.1	0	0	0	0	0.1	0.3	0.4	0.5
		DE	0.4	0.1	0.1	0	-0.1	0	0.1	0.2	0.5	0.5	0.5	0.6	0.7				DE	0.4	0.3	0.1	0	-0.1	-0.1	0	0	0.2	0.3	0.4	0.6	0.7
		DE	0.2	0	0	-0.1	-0.1	-0.1	0	0	0	0.1	0.2	0.3	0.4				DE	0	-0.1	-0.1	-0.1	-0.1	-0.1	0	0	0.3	0.3	0.3	0.4	0.4
		DE	0.3	0.1	0.1	-0.1	-0.1	-0.1	-0.1	0	0.1	0.2	0.6	0.7	0.7				DE	0.1	0.1	0	0	0	0	0.1	0.2	0.3	0.4	0.5	0.6	0.7
		DE	0.2	0.2	0.2	0	-0.1	-0.1	-0.1	-0.1	0	0.2	0.2	0.3	0.3				DE	0.4	0.1	0	-0.1	-0.1	-0.1	0	0.1	0.1	0.2	0.3	0.7	0.7
		DE	0.9	0.7	0.2	0.1	0	0.1	0.1	0.3	0.5	0.8	0.9	1	1				DE	0.9	0.7	0.2	0.1	0	0.1	0.1	0.3	0.5	0.8	0.9	1	1
		DE	0.2	0.1	-0.1	-0.1	-0.1	-0.1	-0.1	0.1	0.2	0.3	0.4	0.4	0.4				DE	0.3	0.2	0.1	-0.1	-0.2	-0.1	-0.1	0.1	0.3	0.3	0.4	0.6	0.7
	post																	pre
		NE	0.8	0.6	0.2	0.1	0	0.1	0.1	0.1	0.1	0.2	0.4	0.5	0.7				NE	0.8	0.3	0.1	-0.1	-0.1	-0.1	-0.1	0	0.1	0.1	0.2	0.3	0.6
		NE	0.6	0.3	0.2	0	-0.1	-0.1	0	0.2	0.2	0.2	0.4	0.4	0.5				NE	0.5	0.3	0	-0.1	-0.1	-0.1	0.1	0.2	0.2	0.5	0.5	0.6	0.6
		NE	0.4	0.2	0.1	-0.1	-0.1	-0.1	-0.1	-0.1	0	0	0.2	0.2	0.4				NE	0.4	0.2	-0.1	-0.1	-0.1	-0.1	-0.1	-0.1	-0.1	-0.1	0.1	0.4	0.5
		NE	0.3	0.2	0.1	0	0	0	0	0.1	0.2	0.3	0.5	0.7	0.8				NE	0.8	0.3	0.2	0	0	0	0.1	0.2	0.4	0.5	0.5	0.6	0.8
		NE	0.4	0.3	0.2	0.1	0	0.1	0.1	0.1	0.2	0.3	0.5	0.6	0.6				NE	0.3	0.2	0.1	0	0	0	0.1	0.2	0.2	0.3	0.4	0.5	0.7
		NE	0.5	0.4	0.3	0	0	-0.1	-0.1	-0.1	0.1	0.3	0.5	0.6	0.7				NE	0.3	0.1	0	0	-0.1	-0.1	0	0.1	0.2	0.2	0.4	0.5	0.8
		NE	0.4	0.3	0.1	0	-0.1	-0.1	-0.1	0.1	0.4	0.5	0.9	1	1				NE	0.8	0.4	0.2	0	0	0	0.2	0.4	0.5	0.5	0.6	0.6	0.8
		NE	0.5	0	0	0	-0.1	-0.1	0	0	0.1	0.2	0.2	0.3	0.5				NE	0.3	0.2	0	0	-0.1	-0.1	-0.1	0	0.2	0.3	0.4	0.9	1
		NE	0.7	0.4	0.6	0.1	0	0.1	0.1	0.1	0.1	0.2	0.4	0.4	0.5				NE	0.5	0.3	0.2	0.1	0	0	0.1	0.2	0.3	0.3	0.5	0.8	1
		NE	0.4	0.3	0.3	0.1	-0.1	-0.1	-0.1	0	0	0.1	0.2	0.3	0.7				NE	0.5	0.4	0.3	0.2	0	0	0.1	0.1	0.1	0.2	0.4	0.5	0.7
		NE	0.6	0.2	0.2	0.1	0.1	-0.1	0	0.1	0.1	0.1	0.3	0.4	0.7				NE	0.4	0.2	0.2	0.1	-0.1	-0.1	-0.1	0	0.1	0.2	0.2	0.3	0.4
		NE	0.4	0.2	0	-0.1	-0.1	-0.1	0	0	0.2	0.4	0.5	0.5	0.7				NE	0.7	0.7	0.3	0.1	-0.2	-0.1	-0.1	-0.1	0	0	0.2	0.3	0.3
		NE	0.4	0.3	0.2	0	0	0	0	0.2	0.3	0.3	0.5	0.7	0.7				NE	0.8	0.6	0.2	0	-0.1	-0.1	-0.1	0	0.2	0.4	0.7	0.8	0.8
		NE	0.2	0.1	-0.1	-0.1	-0.1	-0.1	-0.1	-0.1	-0.1	0	0.1	0.1	0.3				NE	0.3	0.1	0	-0.1	-0.1	-0.1	-0.1	-0.1	0	0	0.2	0.3	0.4
		NE	0.2	0.1	0.1	0	-0.1	0	0	0	0.1	0.1	0.1	0.2	0.2				NE	0.3	0.2	0.1	-0.1	-0.1	-0.1	0	0.1	0.2	0.3	0.3	0.3	0.4
		NE	0.7	0.5	0.2	0.1	0	-0.1	0	0.2	0.4	0.5	0.8	0.8	0.8				NE	0.7	0.5	0.2	0.1	0	-0.1	0	0.2	0.4	0.5	0.8	0.8	0.8
		NE	0.3	0.1	0	-0.1	-0.1	0	0	0.2	0.3	0.3	0.4	0.5	0.6				NE	0.3	0.3	0.1	0	-0.1	-0.1	0	0.1	0.1	0.2	0.3	0.4	0.5
		NE	0.2	0	0	-0.1	-0.1	-0.1	-0.1	-0.1	0	0	0.2	0.3	0.3				NE	0.2	0.2	0	0	-0.1	0	0	0.1	0.1	0.2	0.2	0.3	0.3
		NE	0.2	0.1	0	-0.1	-0.1	-0.2	0	0	0.2	0.2	0.5	0.8	0.9				NE	0.1	0	0	0	0	0	0.1	0.2	0.3	0.4	0.5	0.6	0.8
		NE	0.3	0.1	0.1	0	-0.1	-0.1	0	0	0	0.2	0.2	0.3	0.4				NE	0.4	0.2	0.1	-0.1	-0.1	-0.1	0	0	0.1	0.2	0.2	0.7	0.7
		NE	0.8	0.7	0.3	0	-0.1	0	0.2	0.2	0.3	0.5	0.8	0.9	0.9				NE	0.9	0.6	0.2	0.1	-0.1	-0.1	0.2	0.4	0.6	0.8	0.9	1	1
		NE	0.2	0.2	0.2	-0.1	-0.1	-0.1	-0.1	-0.1	0	0	0.2	0.2	0.3				NE	0.4	0.2	-0.1	-0.1	-0.1	-0.1	-0.1	-0.1	-0.1	-0.1	0.1	0.4	0.5

## Sheet: NEI VFQ-25  and NAVQ
	术后VFQ-25
	post VFQ-25											Vision Specific:
		total	General Health	General Vision	Ocular Pain		Near Activities			Distance Activities			Social Functioning		Mental Health				Role Difficulties		Dependency			Driving			Color Vision	Peripheral Vision
	item		1	2	4	19	5	6	7	8	9	14	11	13	3	21	22	25	17	18	20	23	24	15c	16	16a	12	10
		93.7179487179487	100	80	100	100	100	75	100	100	75	100	100	100	75	100	100	100	100	100	100	100	100	100	100	100	100	100				VFQ-25 categories	术前	术后	Z	p
		89.8575	75	60	100	100	100	75	100	75	75	75	100	75	100	100	100	100	75	75	100	100	100	100	75	75	100	100				General Health	-	-
		77.6211	75	80	100	75	50	50	75	75	75	75	75	75	50	100	100	100	75	50	100	100	100	75	50	50	75	75				General Vision	60.00(60.00,80.00)	80.00(80.00,80.00)	-3	0
		91.1538	75	80	100	100	100	100	100	75	75	75	100	100	75	100	100	100	100	100	100	100	100	100	75	75	100	75				Ocular Pain	75.00(75.00,100.00)	100(75.00,100.00)	1.392	0.164
		96.2963	100	100	100	75	100	100	100	100	100	100	100	100	75	100	100	100	100	100	100	100	100	100	100	100	100	100				Near Activities	75.00(50.00,75.00)	100.00(75.00,100.00)	-5.558	0
		95	75	80	75	100	100	100	100	100	100	100	100	100	100	100	100	100	100	100	100	100	100	100	100	100	100	100				Distance Activities	75.00(75.00,100.00)	100.00(75.00,100.00)	-0.713	0.476
		98.7179	100	100	100	100	100	100	100	100	75	100	100	100	100	100	100	100	100	100	100	100	100	100	75	100	100	100				Vision Specific:
		92.2222	75	80	75	100	100	100	100	100	100	100	100	100	75	100	100	100	100	100	100	100	100	100	100	100	100	100				Social Functioning	100.00(100.00,100.00)	100(100,100)	-1	0.317
		86.7949	75	60	75	100	100	100	100	75	75	75	100	100	75	100	100	100	100	100	100	100	100	100	75	100	100	75				Mental Health	100.00(75.00,100.00)	100.00(100.00,100.00)	-1.499	0.134
		83.7464	75	80	75	50	100	50	75	100	75	100	100	100	75	100	100	100	75	75	100	100	75	100	75	75	100	100				Role Difficulties	100.00(75.00,100.00)	100.00(75.00,100.00)	1.947	0.052
		80.1852	75	80	100	75	75	75	75	75	75	75	75	75	75	100	100	75	75	75	75	75	75	75	75	75	75	75				Dependency	100.00(100.00,100.00)	100.00(100.00,100.00)	-1.732	0.083
		92.2222	50	80	100	100	100	100	100	100	100	100	100	100	50	100	100	100	100	100	100	100	100	100	100	100	100	100				Driving	100.00(75.00,100.00)	100.00(75.00,100.00)	-1.134	0.257
		91.4387	50	80	100	75	100	100	100	50	50	50	100	100	100	75	100	100	100	100	100	100	100	100	100	75	100	100				Color Vision	100.00(100.00,100.00)	100.00(100.00,100.00)	-1	0.317
		97.1368	100	80	100	100	100	100	100	75	100	100	100	100	100	100	100	100	100	100	100	100	100	100	100	100	100	100				Peripheral Vision	100.00(75.00,100.00)	100.00(75.00,100.00)	0	1
		79.6866	75	80	100	75	75	50	100	75	75	100	100	100	50	100	75	50	75	50	100	75	100	100	75	75	100	75				TOTAL SCORE	83.11(79.90,89.20)	91.30(85.27,93.40)	-3.493	0
		90.2991	75	80	100	100	100	75	100	100	100	100	100	100	50	100	100	100	100	100	100	100	100	100	75	75	100	100				Grading scores: 100 points-No difficulty at all;75 points-A little difficulty;50 points-Moderate difficulty; 25point-Extreme difficulty; 0 point-Stopped doing this because of your eyesight; the answer treated as missing-Stopped doing this for other reasons or not interested in doing this
		92.151	75	80	75	100	75	100	100	100	75	75	100	100	100	100	100	100	75	100	100	100	100	100	100	100	100	100
		91.2963	100	80	75	75	100	100	100	100	100	100	100	100	75	100	100	100	100	100	100	100	100	100	100	100	100	100
		90.8689	50	80	100	75	100	100	100	75	75	100	100	100	75	100	100	100	100	100	100	100	100	100	75	75	100	75
		93.0769	75	80	100	100	100	100	100	75	75	100	100	100	75	100	100	100	100	100	100	100	100	100	75	100	100	100
		87.8063	50	80	75	75	75	75	100	100	75	100	100	100	75	100	100	100	100	75	100	100	100	100	75	100	100	100
		84.9573	75	80	100	75	100	75	100	75	75	75	100	100	50	100	100	100	100	50	100	100	100	100	50	75	100	100
	pre VFQ-25
												Vision Specific:
		总分	General Health	General Vision	Ocular Pain		Near Activities			Distance Activities			Social Functioning		Mental Health				Role Difficulties		Dependency			Driving			Color Vision	Peripheral Vision
	item		1	2	4	19	5	6	7	8	9	14	11	13	3	21	22	25	17	18	20	23	24	15c	16	16a	12	10
		79.886	50	60	75	75	50	50	50	75	75	100	100	100	50	100	100	100	100	100	100	100	100	100	75	75	100	100
		71.6952	50	60	100	25	50	50	75	75	75	75	75	75	50	100	100	100	25	50	100	100	100	75	50	50	75	75
		65	25	60	75	75	50	50	50	50	50	50	75	75	50	100	75	75	75	50	100	75	75				75	75
		79.9003	50	80	75	100	50	50	50	100	100	50	75	100	50	100	100	100	75	75	100	100	100	100	50	75	100	100
		82.5356	75	80	75	75	75	50	50	100	100	100	100	100	50	75	100	100	75	75	100	100	100	100	100	100	100	100
		82.4501	25	60	75	100	50	50	50	100	100	100	100	100	50	100	100	100	100	100	100	100	75	100	100	100	100	100
		74.6296	75	80	100	25	75	75	75	75	75	75	75	75	75	100	100	75	25	25	75	75	75	75	75	75	75	75
		73.6895	75	60	100	50	50	50	100	50	75	75	100	100	50	75	75	50	75	50	100	75	100	100	75	75	100	75
		81.8091	50	60	75	75	75	75	75	100	75	100	100	100	50	100	100	100	100	100	100	100	100	100	50	75	100	100
		73.6895	75	60	100	50	50	50	100	50	75	75	100	100	50	75	75	50	75	50	100	75	100	100	75	75	100	75
		80.1852	75	80	100	75	75	75	75	75	75	75	75	75	75	100	100	75	75	75	75	75	75	75	75	75	75	75
		70.9117	50	60	25	50	50	50	75	50	100	100	75	100	75	75	100	100	75	75	100	75	75	100	75	75	75	100
		78.9601	25	60	75	100	25	25	50	100	100	100	100	100	50	100	100	100	75	75	100	100	100	100	75	75	100	100
		77.6211	75	80	100	75	50	50	75	75	75	75	75	75	50	100	100	100	75	50	100	100	100	75	50	50	75	75
		73.6895	75	60	75	50	50	50	100	50	75	75	100	100	75	75	75	50	75	50	100	75	100	75	75	75	100	100
		70.9117	50	60	25	50	50	50	75	50	100	100	75	100	75	75	100	100	75	75	100	75	75	100	75	75	75	100
		73.6895	75	60	100	50	50	50	100	50	75	75	100	100	50	75	75	50	75	50	100	75	100	100	75	75	100	75
		74.6296	75	80	100	25	75	75	75	75	75	75	75	75	75	100	100	75	25	25	75	75	75	75	75	75	75	75
		81.8091	50	60	75	75	75	75	75	100	75	100	100	100	50	100	100	100	100	100	100	100	100	100	50	75	100	100
		71.6952	50	60	100	25	50	50	75	75	75	75	75	75	50	100	100	100	25	50	100	100	100	75	50	50	75	75
		70.9117	50	60	25	50	50	50	75	50	100	100	75	100	75	75	100	100	75	75	100	75	75	100	75	75	75	100
		78.9601	25	60	75	100	25	25	50	100	100	100	100	100	50	100	100	100	75	75	100	100	100	100	75	75	100	100
	pre NAVQ	total												post NAVQ	total
		28	3	3	2	2	2	2	2	3	3	2	4		2	0	0	0	0	0	0	0	1	1	0	0
		26	2	3	2	2	2	3	2	2	2	2	4		0	0	0	0	0	0	0	0	0	0	0	0
		23	2	2	2	2	2	1	2	2	2	2	4		5	1	1	1	0	0	0	0	1	0	0	1
		22	2	2	2	2	1	1	2	2	2	2	4		4	1	1	0	0	0	0	0	1	0	0	1
		21	2	2	2	1	1	1	3	1	2	2	4		4	1	1	0	0	0	0	0	1	0	0	1
		20	2	2	1	1	2	1	1	2	2	2	4		3	0	1	0	0	0	0	0	1	0	0	1
		20	1	2	2	1	2	1	1	3	2	1	4		2	0	0	0	0	0	0	0	1	0	1	0
		19	2	2	1	1	1	1	1	2	2	2	4		8	0	1	0	0	0	0	1	1	0	0	1
		19	2	2	1	2	1	2	1	2	1	1	4		8	0	1	0	0	0	0	1	1	0	0	1
		18	1	1	1	1	2	2	1	2	2	1	4		8	0	0	0	0	0	0	0	0	0	0	0
		18	1	1	2	0	2	1	1	2	3	1	4		7	0	0	0	0	1	0	1	1	0	0	0
		17	1	1	1	1	1	1	1	2	2	2	4		7	0	0	0	0	0	0	0	0	0	0	0
		16	2	2	1	2	0	1	1	1	1	2	3		7	0	0	0	0	0	0	0	1	0	0	0
		16	1	1	1	1	1	1	1	2	2	2	3		6	0	0	0	0	0	0	0	0	0	0	0
		15	1	1	1	1	0	2	1	2	1	2	3		6	0	0	1	0	1	0	0	1	0	0	0
		14	2	2	1	1	1	1	1	1	0	1	3		0	0	0	0	0	0	0	0	0	0	0	0
		20	1	2	2	1	2	1	1	3	2	1	4		2	0	0	0	0	0	0	0	1	0	1	0
		23	2	2	2	2	2	1	2	2	2	2	4		3	0	1	0	0	0	0	0	1	0	0	1
		15	1	1	1	1	0	2	1	2	1	2	2		4	1	1	0	0	0	0	0	1	1	0	0
		21	2	2	2	1	1	1	3	1	2	2	4		5	1	1	1	0	0	0	0	1	0	0	1
		18	1	1	1	1	2	2	1	2	2	1	2		2	0	0	1	0	1	0	0	0	0	0	0
		17	1	1	1	1	1	1	1	2	2	2	3		4	1	1	0	0	0	0	0	1	1	0	0
